# Supplementary material for: Role of electrostatic contributions in the separation of peptides with silica hydride stationary phases
Source: Royal Society of Chemistry journal article supplement (doi:10.1039/c4ay01943a), 2015-01-01
Supplement: c4ay01943a1.pdf [file c4ay01943a1.pdf]

## Supporting Information

1  
2  
3  
4  
5  
6  
7  
8  
9  
10  
11  
12  
13  
14  
15  
16  
17  
18  
19  
20  
21  
22  
23  
24  
25  
26  
27  
28  
29

Role of electrostatic contributions in the separation of peptides with silica hydride stationary phases

Chadin Kulsing<sup>1</sup>, Yuanzhong Yang<sup>1</sup>, Reinhard I. Boysen<sup>1</sup>, Maria T. Matyska<sup>2</sup>, Joseph J. Pesek<sup>2</sup> and

Milton T. W. Hearn<sup>1\*</sup>

<sup>1</sup> Australian Research Council Special Research Centre for Green Chemistry, School of Chemistry,  
Monash University, Melbourne, Victoria 3800, Australia

<sup>2</sup> Department of Chemistry, San Jose State University, San Jose, CA 95192, USA

This supporting information contains an expanded description of experimental procedures as well  
as supplementary experimental results.

### Table of contents

**Experimental procedures:** Calculation of peptide charges.

**Table SI-1.** Calculated pH of the mobile phases employed.

**Table SI-2.** Dependence of the values of the solvatochromic solvent descriptors on the ACN content for  
various aqueous/ACN mixtures.

**Table SI-3.** Multi-parametric relationships between  $\log k$  of peptides **1-6** and the relevant descriptors of  
the mobile phase contributions with the different  $(\log k)_0$  values and correlation coefficients  
 $s$ ,  $a$  and  $b$ .

**Table SI-4.** Modified multi-parametric relationships between  $\log k$  and including the correction of the  
electrostatic contribution ( $\log k_{corr}$ ) of peptide **1-6** and the descriptors of the mobile phases  
contributions with different  $(\log k^*)_0$  values and correlation coefficients  $s$ ,  $a$  and  $b$ .

**Figure SI-1.** Plots of the total calculated charges ( $q_{tot}$ ) of different peptides as a function of pH.

**Figure SI-2.** Correlations between the calculated  $\log k$  values derived from the multi-parametric  
relationships and the corresponding experimentally obtained  $\log k$  values for the peptide **1-6**.

**Figure SI-3.** Isocratic separation of peptides **2, 3, 4** and **6** (A) and peptide **1** and **5** by using the Diamond  
Hydride stationary phase with the mobile phase containing 40% (v/v) ACN and 0.1% (v/v)  
AA.

### 30 **Supporting Information Related To Experimental Procedures**

31 Calculation of peptide charges. The total charge of a peptide ( $q_{tot}$ ) as a function of pH can be  
32 defined, in the absence of any mobile phase effects due to the choice of a specific ACN content or  
33 buffer composition, as the sum of all positive charges ( $q^+$ ) and all negative charges ( $q^-$ ) of the

34 individual ionizable functionalities in the peptide, *e.g.*  $q_{tot} = \sum_{i=1}^m q_i^+ + \sum_{j=1}^n q_j^-$ . The effective  
35 peptide charge ( $q_{eff}$ ) at a specific mobile phase pH value can then be determined using the *Peptide*  
36 *Charge* software from the average values of  $q_{tot}$  and  $q^+$  (or  $q^-$ ) so obtained.

37 In contrast to the use of  $q_{eff}$ , the use of the total calculated charge,  $q_{tot}$ , is not suitable for the  
38 calculation of  $\Delta G_{elec}$  since  $q_{tot}$  does not discriminate between peptides without any charge to those  
39 with the same number of positive and negative charges. Because peptides can conformationally  
40 orient themselves to promote retention,<sup>1</sup> two extreme cases were thus considered for their  
41 interactive behavior with the DH phase, namely attraction of positively charged peptides and  
42 repulsion of negatively charged peptides, *i.e.* when there is no contribution of negative charges to  
43 the retention (assuming no repulsion force occurs using  $q^+$  for charge calculation) and when there is  
44 100% contribution of those negative charges (using  $q_{tot}$  for charge calculation). The  $q_{eff}$  value was  
45 calculated from the average values of these two extreme cases.

46

### 47 **Supporting Information Related To Additional Results**

48 It can be noted that negative values of the correlation coefficients ( $s$ ,  $a$  or  $b$ ) mean that a decrease in  
49 retention is favored due to an increase in peptide-mobile phase interactions. In these circumstances,  
50 the magnitude of the mobile phase parameters related to dipolarity ( $\pi_m^*$ ), hydrogen bonding acidity ( $\alpha_m$ ) and hydrogen bonding basicity ( $\beta_m$ ) will also reflect the extent by which ACN in water is able  
51 to form solvent clusters.<sup>2</sup> Plots of the calculated and experimentally obtained  $\log k$  values of the  
52

53 peptides with mobile phases of different ACN content are shown in Figure S-2A-D, with  $R^2$  being  
 54 close to 1, as shown in Table S3. Consistent with the observation that peptides containing less polar  
 55 amino acids tend to elute early in conventional aqueous normal phase chromatography,<sup>3</sup> peptide **1**  
 56 with a less polar amino acid composition and with a lower  $q_{tot}$  eluted earlier than peptide **2** with  
 57 ACN mobile phases containing 0.1% (v/v) FA (Figure 1). However, for peptides **3-6** in the presence  
 58 of 0.1% (v/v) FA, the retention order was peptide **6** > **4** > **3** > **5** (Figure 1). Consequently, in these  
 59 cases, the observed elution order did not follow the magnitude of the calculated total peptide  
 60 charge,  $q_{tot}$ , as a function of pH (Figure S-1), confirming that the influence of the ACN content on  
 61 the  $pK_a$ 's of the individual ionizable functionalities of the peptides and thus the hydrogen bonding  
 62 basicity parameter,  $b$ , need to be taken into account.

63 **Table SI-1.** Calculated pH of the mobile phases employed, approximated using the Peakmaster 5.2  
 64 software with  $pK_a$  correction.<sup>4</sup>

| % (v/v)<br>Acetonitrile | Calculated pH with additive |               |               |                |
|-------------------------|-----------------------------|---------------|---------------|----------------|
|                         | 0.1% (v/v) FA               | 0.2% (v/v) AA | 0.1% (v/v) AA | 0.05% (v/v) AA |
| 0                       | 2.68                        | 3.11          | 3.26          | 3.42           |
| 10                      | 2.81                        | 3.27          | 3.42          | 3.57           |
| 20                      | 2.90                        | 3.38          | 3.53          | 3.69           |
| 30                      | 3.00                        | 3.50          | 3.65          | 3.80           |
| 40                      | 3.11                        | 3.62          | 3.77          | 3.93           |
| 50                      | 3.24                        | 3.78          | 3.93          | 4.08           |
| 60                      | 3.42                        | 3.97          | 4.12          | 4.27           |

65  
 66 **Table SI-2.** Dependence of the values of the solvatochromic solvent descriptors on the ACN  
 67 content for various aqueous/ACN mixtures.

| % (v/v) Acetonitrile | $\pi_m^*$ | $\alpha_m$ | $\beta_m$ |
|----------------------|-----------|------------|-----------|
| 80                   | 0.80      | 0.85       | 0.59      |
| 70                   | 0.82      | 0.91       | 0.59      |
| 65                   | 0.85      | 0.91       | 0.59      |
| 60                   | 0.87      | 0.91       | 0.60      |
| 50                   | 0.92      | 0.91       | 0.60      |
| 40                   | 0.95      | 0.91       | 0.61      |
| 30                   | 0.97      | 0.94       | 0.61      |
| 20                   | 1.05      | 0.98       | 0.61      |
| 10                   | 1.10      | 1.06       | 0.59      |

68

69 **Table SI-3.** Multi-parametric relationships between  $\log k$  of peptides **1-6** and the relevant  
70 descriptors of the mobile phase contributions ( $\pi_m^*$ ,  $\alpha_m$  and  $\beta_m$ ) with the different  $(\log k)_0$  values and  
71 correlation coefficients  $s$ ,  $a$  and  $b$  derived according to the corresponding LSER Eqn 1, using using  
72 least chi square curve-fitting procedures.

| Mobile phase   | Analyte   | Multiparametric relationships                                 | R <sup>2</sup> | Slope |
|----------------|-----------|---------------------------------------------------------------|----------------|-------|
| 0.10% (v/v) FA | peptide 1 | $\log k = 0.05 - 2.88\pi_m^* + 2.48\alpha_m + 0.08\beta_m$    | 0.967          | 1.033 |
|                | peptide 2 | $\log k = -0.08 - 2.98\pi_m^* + 2.65\alpha_m + 0.24\beta_m$   | 0.975          | 1.047 |
|                | peptide 3 | $\log k = 5.20 - 5.37\pi_m^* + 3.31\alpha_m - 5.20\beta_m$    | 0.955          | 1.163 |
|                | peptide 4 | $\log k = 5.56 - 5.68\pi_m^* + 3.54\alpha_m - 5.65\beta_m$    | 0.954          | 1.155 |
|                | peptide 5 | $\log k = 4.89 - 5.50\pi_m^* + 3.61\alpha_m - 4.97\beta_m$    | 0.949          | 1.186 |
|                | peptide 6 | $\log k = 6.63 - 5.44\pi_m^* + 3.32\alpha_m - 6.93\beta_m$    | 0.954          | 1.140 |
| 0.20% (v/v) AA | peptide 1 | $\log k = 6.97 - 0.97\pi_m^* - 1.72\alpha_m - 7.51\beta_m$    | 0.997          | 0.997 |
|                | peptide 2 | $\log k = 8.62 - 0.78\pi_m^* - 2.29\alpha_m - 9.44\beta_m$    | 0.989          | 1.000 |
|                | peptide 3 | $\log k = 16.40 - 1.89\pi_m^* - 4.10\alpha_m - 16.95\beta_m$  | 0.980          | 1.033 |
|                | peptide 4 | $\log k = 19.15 - 1.57\pi_m^* - 5.35\alpha_m - 19.88\beta_m$  | 0.978          | 1.028 |
|                | peptide 5 | $\log k = 18.08 - 1.76\pi_m^* - 4.92\alpha_m - 18.55\beta_m$  | 0.974          | 1.004 |
|                | peptide 6 | $\log k = 20.72 + 1.30\pi_m^* - 8.35\alpha_m - 22.36\beta_m$  | 0.996          | 1.004 |
| 0.10% (v/v) AA | peptide 1 | $\log k = 7.81 - 0.65\pi_m^* - 2.20\alpha_m - 8.66\beta_m$    | 0.948          | 0.978 |
|                | peptide 2 | $\log k = 9.36 - 0.88\pi_m^* - 2.48\alpha_m - 10.13\beta_m$   | 0.975          | 0.997 |
|                | peptide 3 | $\log k = 17.54 - 1.74\pi_m^* - 4.61\alpha_m - 18.14\beta_m$  | 0.971          | 1.000 |
|                | peptide 4 | $\log k = 20.28 - 1.75\pi_m^* - 5.55\alpha_m - 20.97\beta_m$  | 0.958          | 0.995 |
|                | peptide 5 | $\log k = 19.30 - 1.03\pi_m^* - 6.13\alpha_m - 19.73\beta_m$  | 0.959          | 1.000 |
|                | peptide 6 | $\log k = 23.36 + 1.73\pi_m^* - 9.54\alpha_m - 25.37\beta_m$  | 0.999          | 1.001 |
| 0.05% (v/v) AA | peptide 1 | $\log k = 8.84 - 0.39\pi_m^* - 2.71\alpha_m - 9.88\beta_m$    | 0.978          | 0.984 |
|                | peptide 2 | $\log k = 10.72 - 0.15\pi_m^* - 3.46\alpha_m - 11.92\beta_m$  | 0.972          | 0.904 |
|                | peptide 3 | $\log k = 18.74 + 1.52\pi_m^* - 7.87\alpha_m - 20.14\beta_m$  | 0.986          | 1.000 |
|                | peptide 4 | $\log k = 21.14 + 1.83\pi_m^* - 9.04\alpha_m - 22.56\beta_m$  | 0.989          | 1.000 |
|                | peptide 5 | $\log k = 20.28 + 1.53\pi_m^* - 8.60\alpha_m - 21.47\beta_m$  | 0.989          | 1.000 |
|                | peptide 6 | $\log k = 24.77 + 2.34\pi_m^* - 10.40\alpha_m - 27.09\beta_m$ | 0.988          | 0.998 |

73

74

75

76

77

78

79

80 **Table SI-4.** Modified multi-parametric relationships between  $\log k$  and including the correction of  
 81 the electrostatic contribution ( $\log k_{\text{corr}}$ ) of peptide **I-6** and the descriptors of the mobile phases  
 82 contributions ( $\pi_m^*$ ,  $\alpha_m$  and  $\beta_m$ ) with different  $(\log k^*)_0$  values and correlation coefficients  $s$ ,  $a$  and  $b$   
 83 derived according to the corresponding LSER Eqn 7 using least chi square curve-fitting  
 84 procedures.

| Mobile phase   | Analyte   | Modified multiparametric relationships                                     | R <sup>2</sup> | Slope |
|----------------|-----------|----------------------------------------------------------------------------|----------------|-------|
| 0.10% (v/v) FA | peptide 1 | $\log k_{\text{corr}} = -4.35 - 1.96\pi_m^* + 2.37\alpha_m + 5.94\beta_m$  | 0.947          | 1.016 |
|                | peptide 2 | $\log k_{\text{corr}} = -3.42 - 1.27\pi_m^* + 1.50\alpha_m + 4.66\beta_m$  | 0.971          | 1.003 |
|                | peptide 3 | $\log k_{\text{corr}} = -7.12 - 4.93\pi_m^* + 5.44\alpha_m + 10.88\beta_m$ | 0.957          | 0.960 |
|                | peptide 4 | $\log k_{\text{corr}} = -6.68 - 5.22\pi_m^* + 5.63\alpha_m + 10.32\beta_m$ | 0.954          | 0.959 |
|                | peptide 5 | $\log k_{\text{corr}} = -3.00 - 3.67\pi_m^* + 3.38\alpha_m + 5.24\beta_m$  | 0.958          | 0.955 |
|                | peptide 6 | $\log k_{\text{corr}} = -1.44 - 2.28\pi_m^* + 1.57\alpha_m + 3.27\beta_m$  | 0.973          | 1.064 |
| 0.20% (v/v) AA | peptide 1 | $\log k_{\text{corr}} = 6.47 - 0.08\pi_m^* - 2.43\alpha_m - 7.20\beta_m$   | 0.984          | 0.997 |
|                | peptide 2 | $\log k_{\text{corr}} = 5.82 + 0.19\pi_m^* - 2.54\alpha_m - 6.25\beta_m$   | 0.986          | 1.003 |
|                | peptide 3 | $\log k_{\text{corr}} = 5.64 - 1.80\pi_m^* + 1.07\alpha_m - 7.93\beta_m$   | 0.974          | 1.025 |
|                | peptide 4 | $\log k_{\text{corr}} = 6.80 - 1.66\pi_m^* + 0.02\alpha_m - 8.26\beta_m$   | 0.970          | 1.013 |
|                | peptide 5 | $\log k_{\text{corr}} = 8.89 - 0.43\pi_m^* - 3.57\alpha_m - 8.17\beta_m$   | 0.981          | 1.016 |
|                | peptide 6 | $\log k_{\text{corr}} = 9.45 + 0.46\pi_m^* - 4.75\alpha_m - 8.54\beta_m$   | 0.984          | 0.987 |
| 0.10% (v/v) AA | peptide 1 | $\log k_{\text{corr}} = 5.69 - 1.29\pi_m^* - 1.18\alpha_m - 5.88\beta_m$   | 0.951          | 0.997 |
|                | peptide 2 | $\log k_{\text{corr}} = 4.49 - 1.69\pi_m^* - 0.60\alpha_m - 3.99\beta_m$   | 0.985          | 0.999 |
|                | peptide 3 | $\log k_{\text{corr}} = 5.17 - 1.40\pi_m^* - 1.42\alpha_m - 3.90\beta_m$   | 0.973          | 1.010 |
|                | peptide 4 | $\log k_{\text{corr}} = 7.14 - 1.00\pi_m^* - 2.60\alpha_m - 5.75\beta_m$   | 0.967          | 0.990 |
|                | peptide 5 | $\log k_{\text{corr}} = 6.64 - 1.70\pi_m^* - 2.21\alpha_m - 4.43\beta_m$   | 0.977          | 1.000 |
|                | peptide 6 | $\log k_{\text{corr}} = 9.63 - 1.33\pi_m^* - 3.44\alpha_m - 7.87\beta_m$   | 1.000          | 1.000 |
| 0.05% (v/v) AA | peptide 1 | $\log k_{\text{corr}} = 8.69 - 0.92\pi_m^* - 2.40\alpha_m - 9.45\beta_m$   | 0.990          | 1.004 |
|                | peptide 2 | $\log k_{\text{corr}} = 7.31 - 0.67\pi_m^* - 2.32\alpha_m - 7.55\beta_m$   | 0.997          | 0.999 |
|                | peptide 3 | $\log k_{\text{corr}} = 4.67 - 0.04\pi_m^* - 2.53\alpha_m - 3.44\beta_m$   | 0.985          | 1.001 |
|                | peptide 4 | $\log k_{\text{corr}} = 5.64 - 0.13\pi_m^* - 3.02\alpha_m - 3.91\beta_m$   | 0.989          | 1.001 |
|                | peptide 5 | $\log k_{\text{corr}} = 9.33 - 0.75\pi_m^* - 3.62\alpha_m - 8.08\beta_m$   | 0.992          | 1.000 |
|                | peptide 6 | $\log k_{\text{corr}} = 10.99 - 2.53\pi_m^* - 2.67\alpha_m - 9.17\beta_m$  | 0.999          | 0.998 |

85

86

87

88

89

90

91 **Supporting Information Related to the Total Calculated Charges ( $Q_{tot}$ ) of Different Peptides**  
92 **as a Function of pH**

93 **Figure SI-1.** Plots of the total calculated charges ( $q_{tot}$ ) of different peptides (red ●, green ▼, yellow

94 ■, pink □, dark blue ◆ and light blue ● for peptide 1-6, respectively) as a function of pH, covering

95 the range of mobile phase pH values used in this study (Table SI-1) and including the  $pK_a$  values of

96 the peptide functionalities. F = faraday (unit of charge). Since peptides 3 and 4 are isomers, they

97 shared the same calculated  $q_{tot}$  charge value.

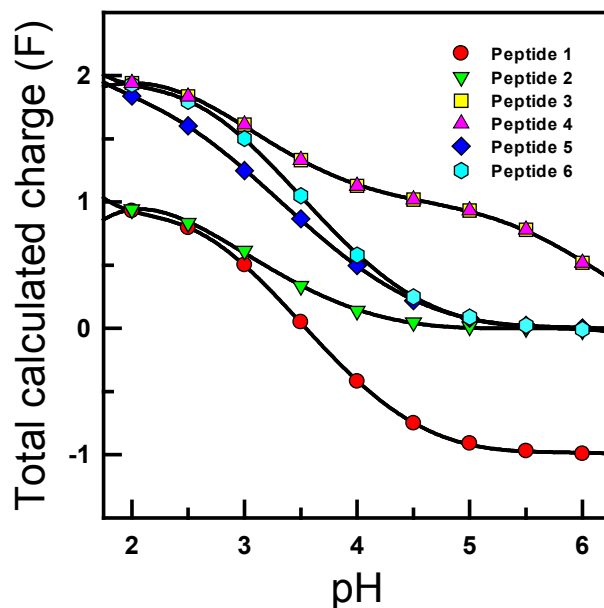

98

99

100 **Supporting Information Related to the Correlations between the Calculated Log  $K$  Values**  
101 **and the Corresponding Experimentally Obtained Log  $k$  Values for the Peptide 1-6**

102 **Figure SI-2.** Correlations between the calculated log  $k$  values derived from the multi-parametric  
103 relationships (as defined in Equation 1 and shown in Table S-3) and the corresponding  
104 experimentally obtained log  $k$  values for the peptide 1-6 (red ●, green ▼, yellow ■, pink □, dark  
105 blue ◆ and light blue ● for peptide 1-6, respectively) using aqueous/ACN mobile phases with  
106 different ACN contents and acid additives, A: 0.1% (v/v) formic acid (with 10, 20, 30, 40, 50 and  
107 60% (v/v) of ACN), B: 0.2% (v/v) acetic acid, C: 0.1% (v/v) acetic acid and D: 0.05% (v/v) acetic  
108 acid (all with 10, 20, 30, 40, 45 and 50% (v/v) of ACN).

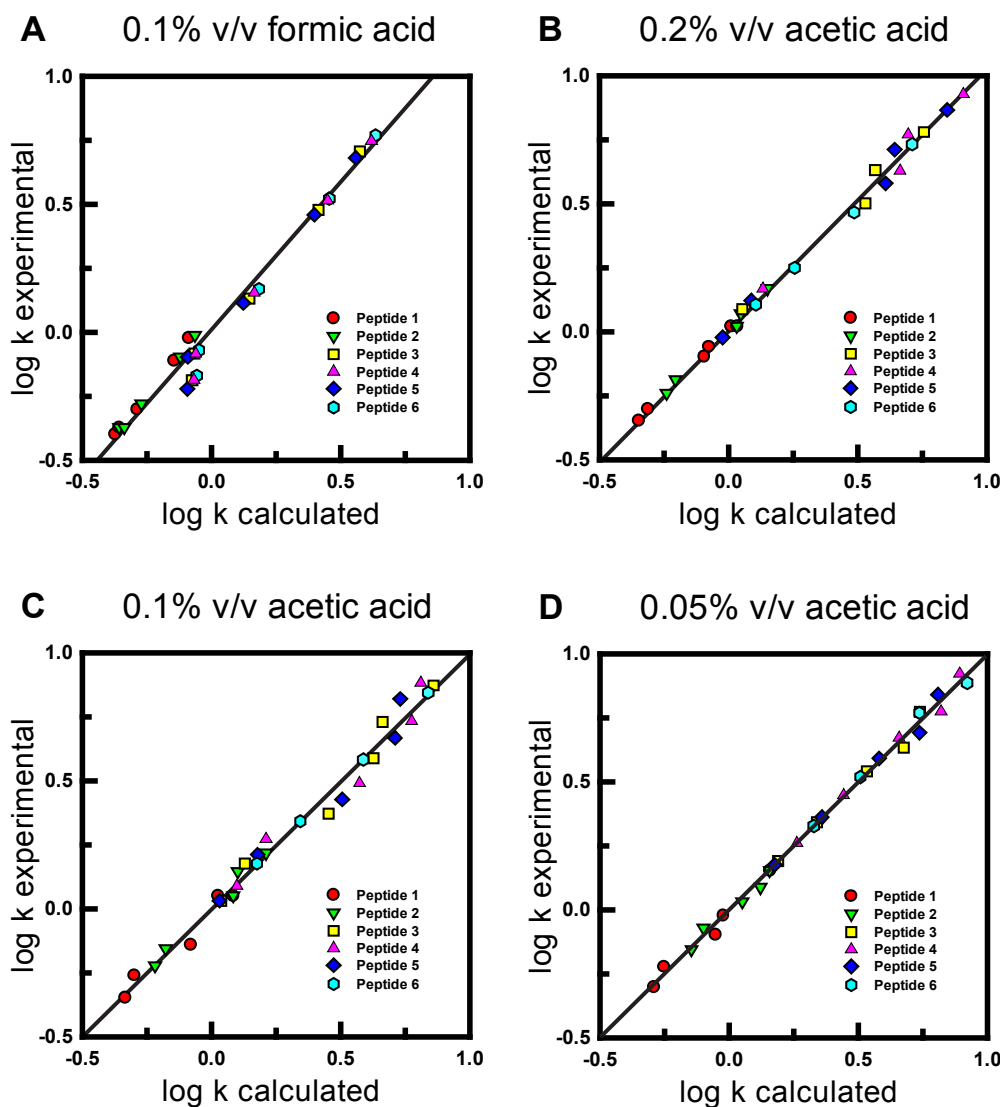

109

111 **Supporting Information Related to the chromatogram and peak symmetry of the Peptide 1-6**  
112 **Figure SI-3.** Isocratic separation of peptides **2, 3, 4** and **6** (A) and peptide **1** and **5** by using the  
113 Diamond Hydride stationary phase with the mobile phase containing 40% (v/v) ACN and 0.1%  
114 (v/v) AA.  
115

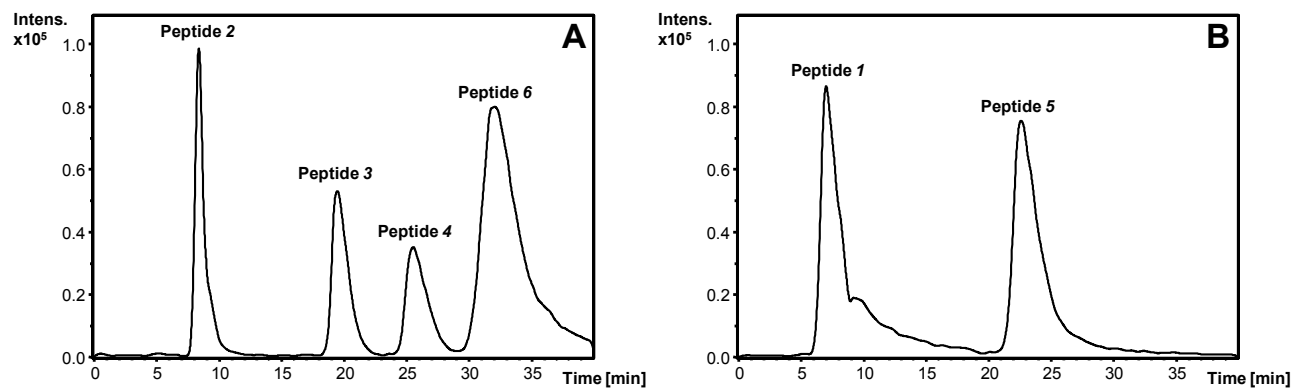

116  
117  
118



119

120

## 121 REFERENCES

122 (1) Alpert, A. J.; Petritis, K.; Kangas, L.; Smith, R. D.; Mechtler, K.; Mitulovic, G.; Mohammed,  
123 S.; Heck, A. J. R. *Anal. Chem.* **2010**, *82*, 5253-5259.

124 (2) Boysen, R. I.; Jong, A. J. O.; Hearn, M. T. W. *J. Chromatogr. A* **2005**, *1079*, 173-186.

125 (3) Yang, Y.; Boysen, R. I.; Kulsing, C.; Matyska, M. T.; Pesek, J. J.; Hearn, M. T. W. *J. Sep.*  
126 *Sci.* **2013**, *36*, 3019-3025.

127 (4) Subirats, X.; Roses, M.; Bosch, E. *Separation and Purification Reviews* **2007**, *36*, 231-255.

128

129

130 **Abbreviations:** **AA**, acetic acid; **ACN**, acetonitrile; **AF**, ammonium formate; **ANP**, aqueous  
131 normal-phase; **DH**, Diamond Hydride™; **EOF**, electro-osmotic flow; **ESI**, electrospray ionization;  
132 **FA**, formic acid; **HILIC**, hydrophilic interaction liquid chromatography; **HR/MAS NMR**, high-  
133 resolution/magic-angle-spinning nuclear magnetic resonance; **LC**, liquid chromatography; **LSER**,  
134 linear solvation energy relationships; **RP**, reversed-phase.

135

## 136 Symbols:

137  $a$  Correlation coefficient of analyte contribution to solute-mobile phase  
138 interactions related to hydrogen bonding acidity

139  $a_{\text{(particle)}}$  Radius of the particles

140  $\alpha_m$  Parameter describing the mobile phase contribution to solute-mobile phase  
141 interactions related to hydrogen bonding acidity

142  $\alpha_s$  Parameter describing the stationary phase contribution to solute-stationary

|     |                                                                                                |
|-----|------------------------------------------------------------------------------------------------|
| 143 | phase interactions related to hydrogen bonding acidity                                         |
| 144 | $b$ Correlation coefficient of analyte contribution to solute-mobile phase                     |
| 145 | interactions related to hydrogen bonding basicity                                              |
| 146 | $\beta_m$ Parameter describing the mobile phase contribution to solute-mobile phase            |
| 147 | interactions related to hydrogen bonding basicity                                              |
| 148 | $\beta_s$ Parameter describing the stationary phase contribution to solute-stationary          |
| 149 | phase interactions related to hydrogen bonding basicity                                        |
| 150 | $\Delta G_{tot}$ Total free energy change associated with retention                            |
| 151 | $\Delta G_{corr}$ Free energy change associated with retention contributed from non-           |
| 152 | electrostatic interactions                                                                     |
| 153 | $\Delta G_{elec}$ Free energy changes associated with retention contributed from electrostatic |
| 154 | interactions                                                                                   |
| 155 | $\% \Delta G_{elec}$ Percent contribution towards spontaneous retention due to electrostatic   |
| 156 | interactions                                                                                   |
| 157 | $E$ Electrostatic energy                                                                       |
| 158 | $\varepsilon$ Dielectric constant                                                              |
| 159 | $F$ Faraday constant                                                                           |
| 160 | $f(\kappa a)$ Henry's function                                                                 |
| 161 | $k$ Retention factor                                                                           |
| 162 | $k_{corr}$ Retention factor arising from all non-electrostatic interactions                    |
| 163 | $k_{elec}$ Retention factor contributions arising from all electrostatic interactions          |
| 164 | $\kappa$ Inverse Debye length                                                                  |
| 165 | $(\log k)_0$ Intercept of the regression in the multi-parametric analysis as defined in        |
| 166 | Equation 1                                                                                     |

|     |                |                                                                             |
|-----|----------------|-----------------------------------------------------------------------------|
| 167 | $(\log k^*)_0$ | Intercept of the regression in the multi-parametric analysis as defined in  |
| 168 |                | Equation 7                                                                  |
| 169 | $\eta$         | Viscosity                                                                   |
| 170 | $\pi_m^*$      | Parameter describing the mobile phase contribution to solute-mobile phase   |
| 171 |                | interactions related to dipolarity/polarizability                           |
| 172 | $\pi_s^*$      | Parameter describing the stationary phase contribution to solute-stationary |
| 173 |                | phase interactions related to dipolarity/polarizability                     |
| 174 | $q^+$          | Sum of all positive charges on a peptide                                    |
| 175 | $q_{eff}$      | Effective peptide charge                                                    |
| 176 | $q_{tot}$      | Total charge of a peptide                                                   |
| 177 | $q^-$          | Sum of all negative charges on a peptide                                    |
| 178 | $R$            | Universal gas constant                                                      |
| 179 | $s$            | Correlation coefficient derived from the multi-parametric analysis due to   |
| 180 |                | solute-mobile phase interactions related to dipolarity/polarizability       |
| 181 | $T$            | Absolute temperature                                                        |
| 182 | $u_e$          | Mobility of particles                                                       |
| 183 | $\varphi$      | Phase ratio                                                                 |
| 184 | $\zeta$        | Zeta potential                                                              |
| 185 |                |                                                                             |
| 186 |                |                                                                             |
| 187 |                |                                                                             |
| 188 |                |                                                                             |
